# Supplementary material for: Comparative Transcriptome Analysis of the Pinewood Nematode Bursaphelenchus xylophilus Reveals the Molecular Mechanism Underlying Its Defense Response to Host-Derived α-pinene
Source: PubMed Central journal article supplement (PMC6412324; doi:10.3390/ijms20040911), 2019-02-20
Supplement: ijms-20-00911-s001.pdf [file ijms-20-00911-s001.pdf]

# Supplementary Materials

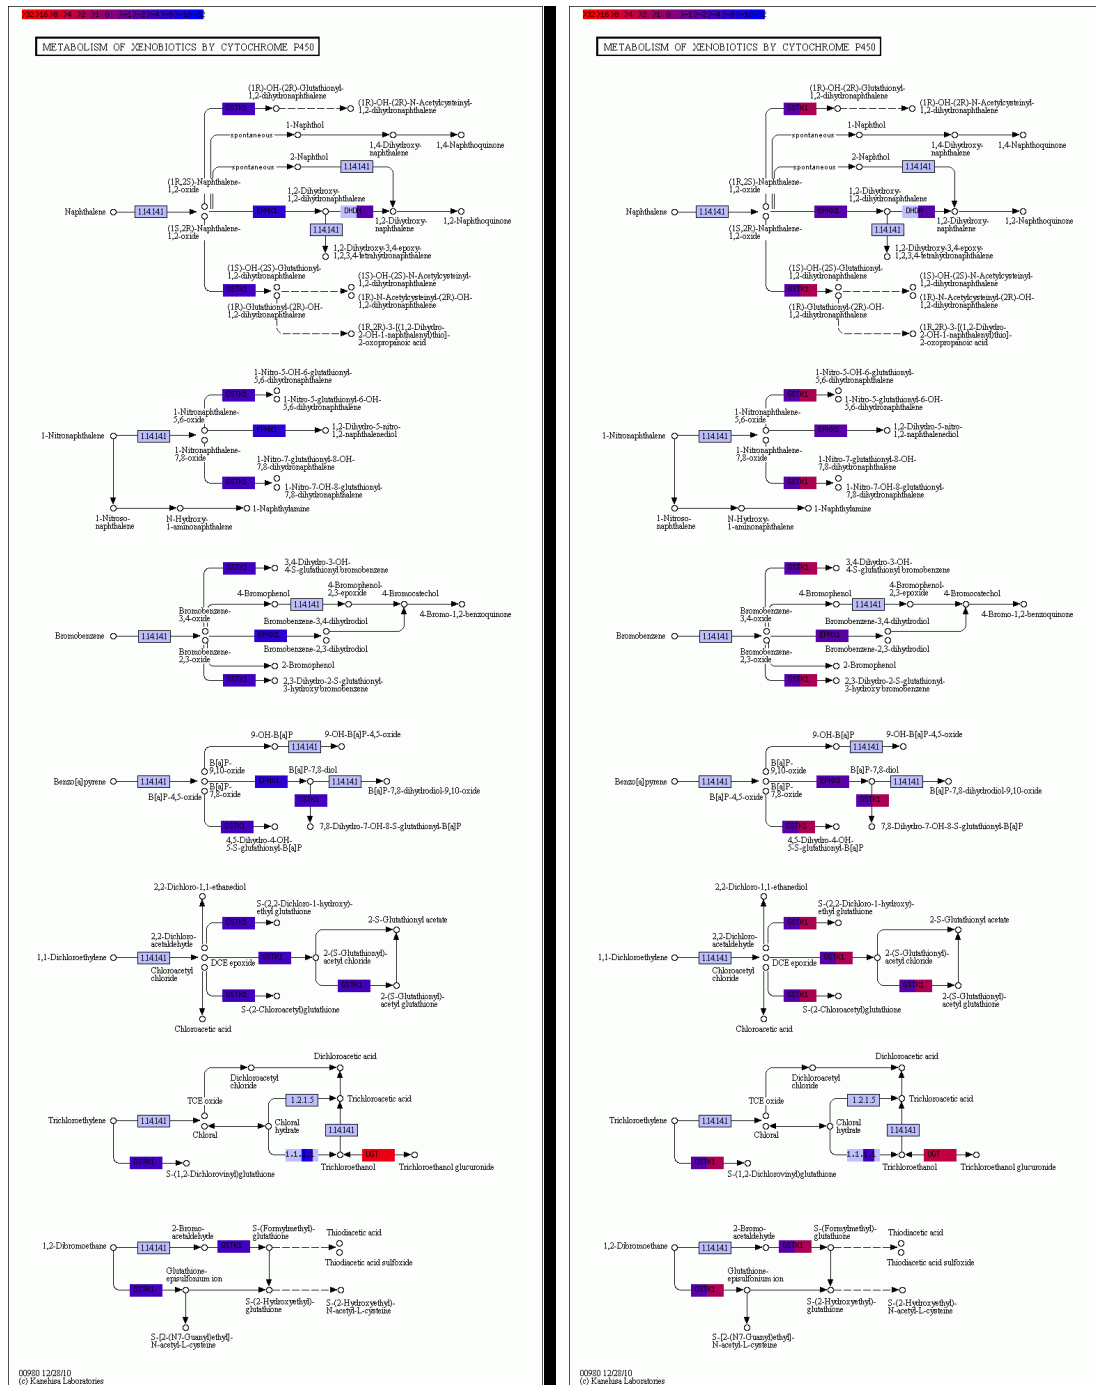

AD

AG

Figure S1. KEGG pathways for metabolism of xenobiotics by cytochrome P450.

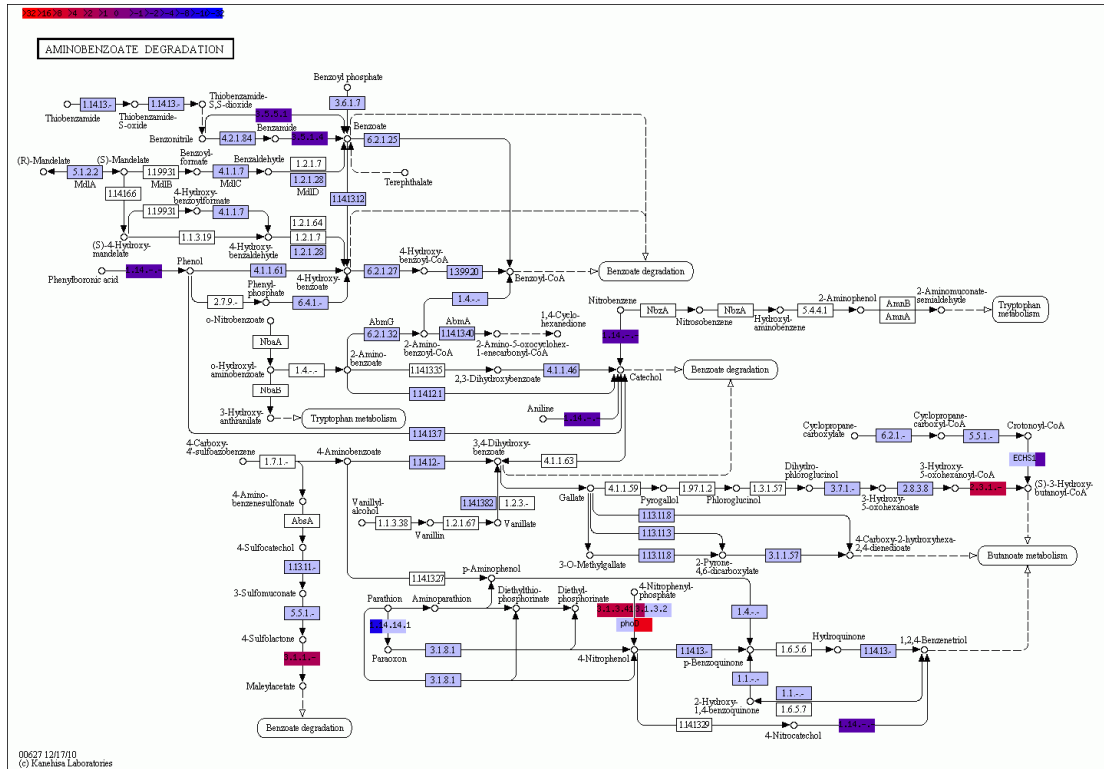

AD

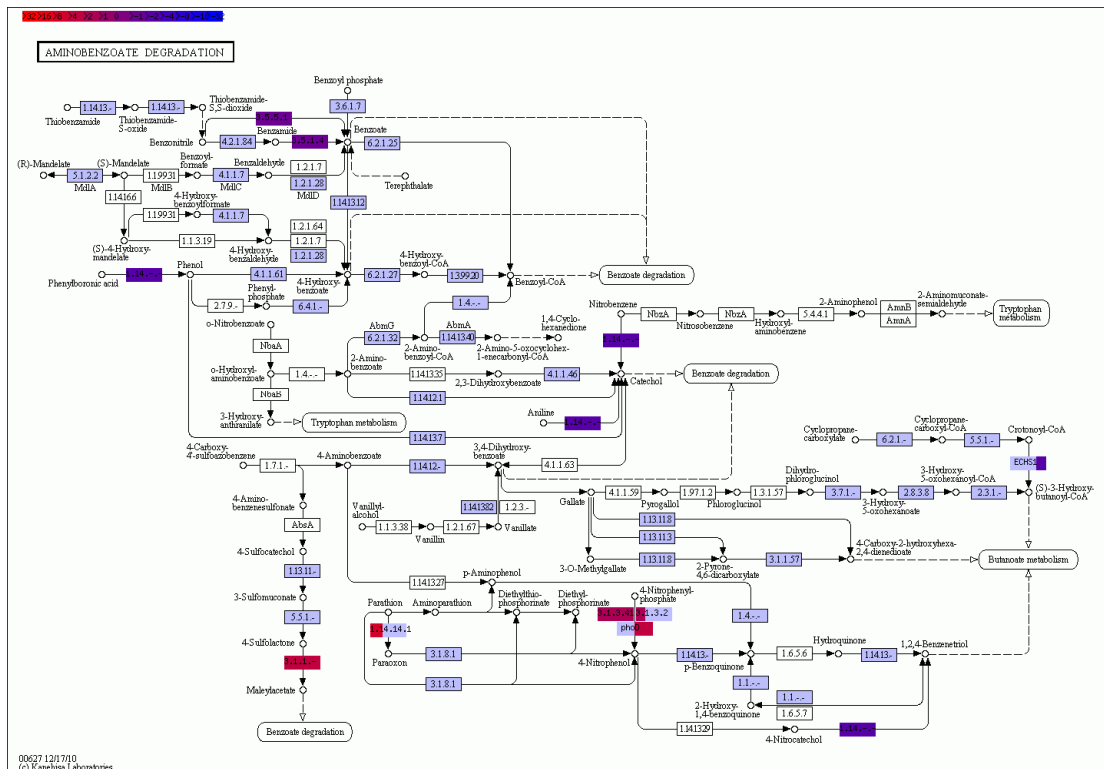

AG

Figure S2. KEGG pathways for aminobenzoate degradation.

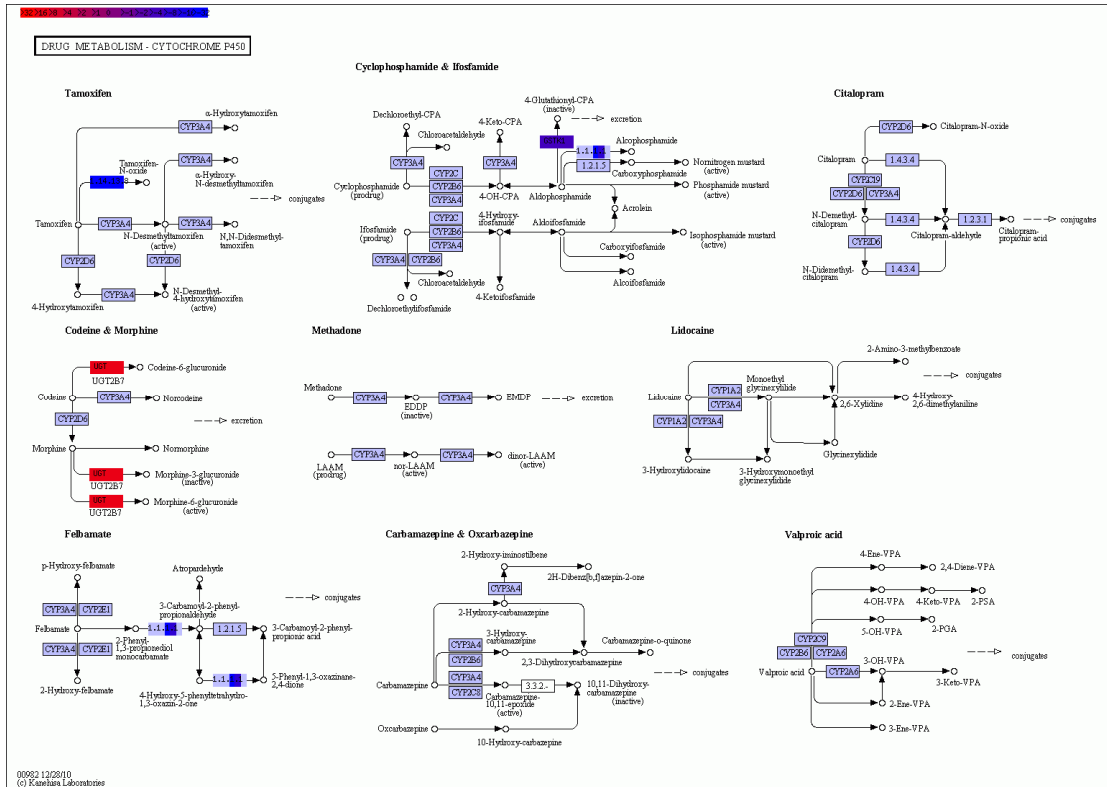

AD

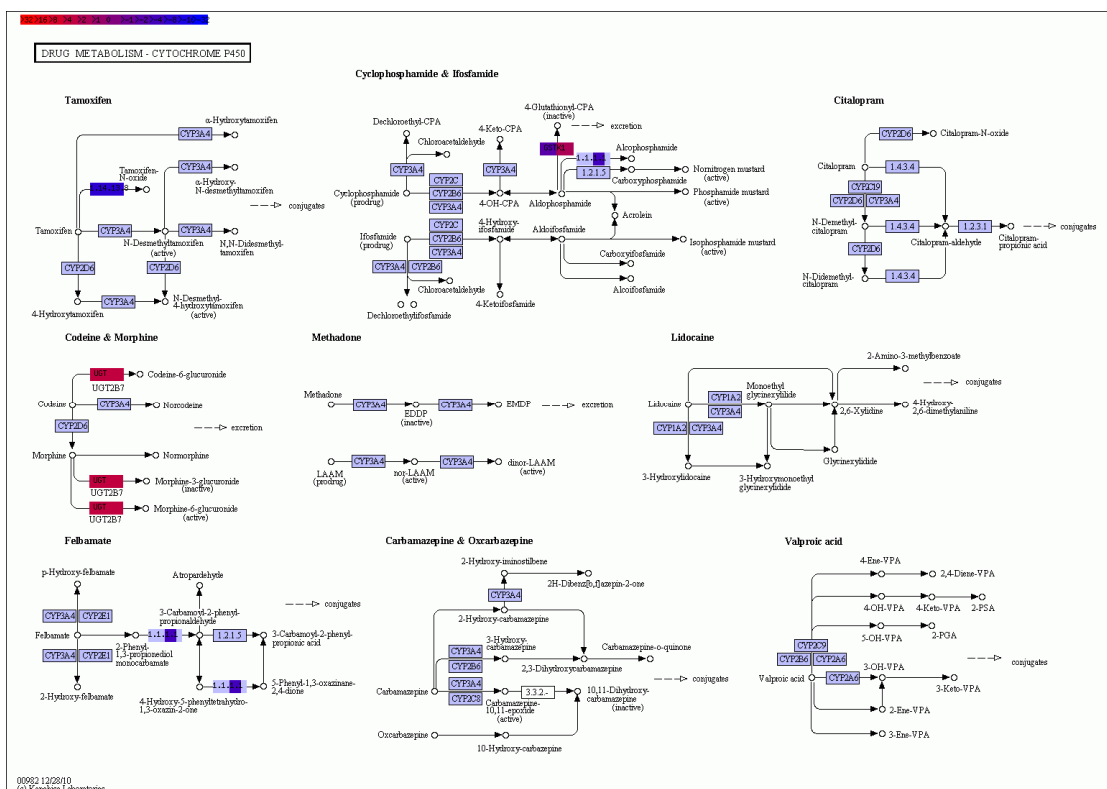

AG

Figure S3. KEGG pathways for drug metabolism-cytochrome P450.

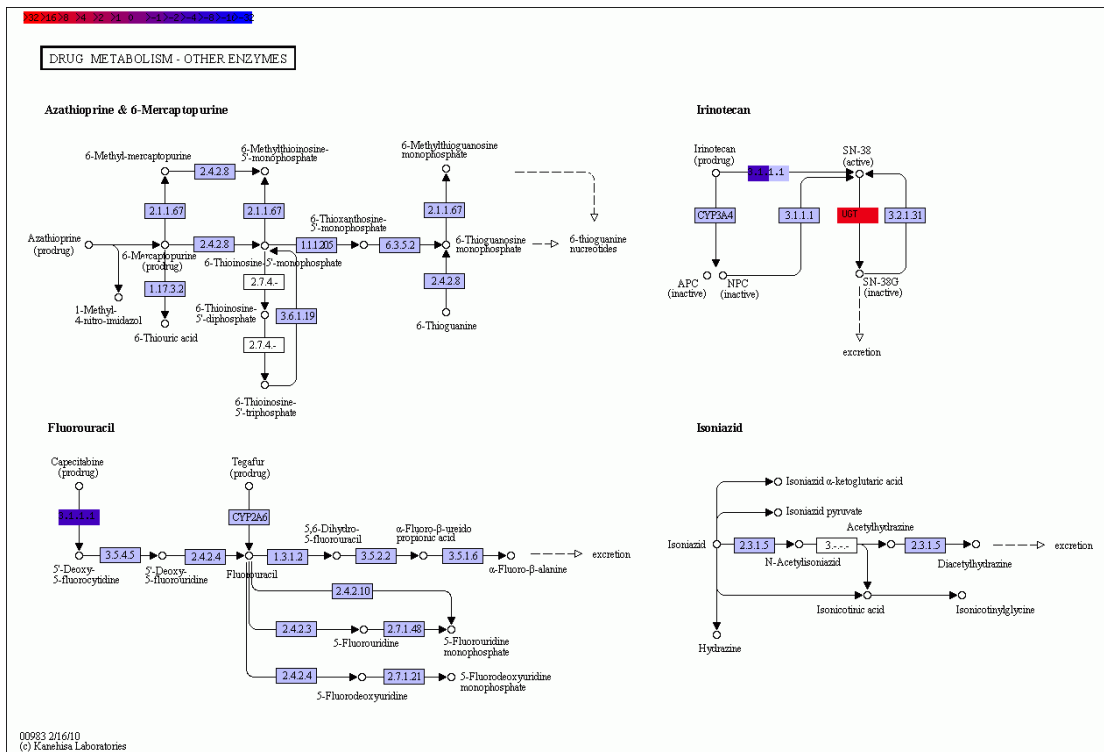

AD

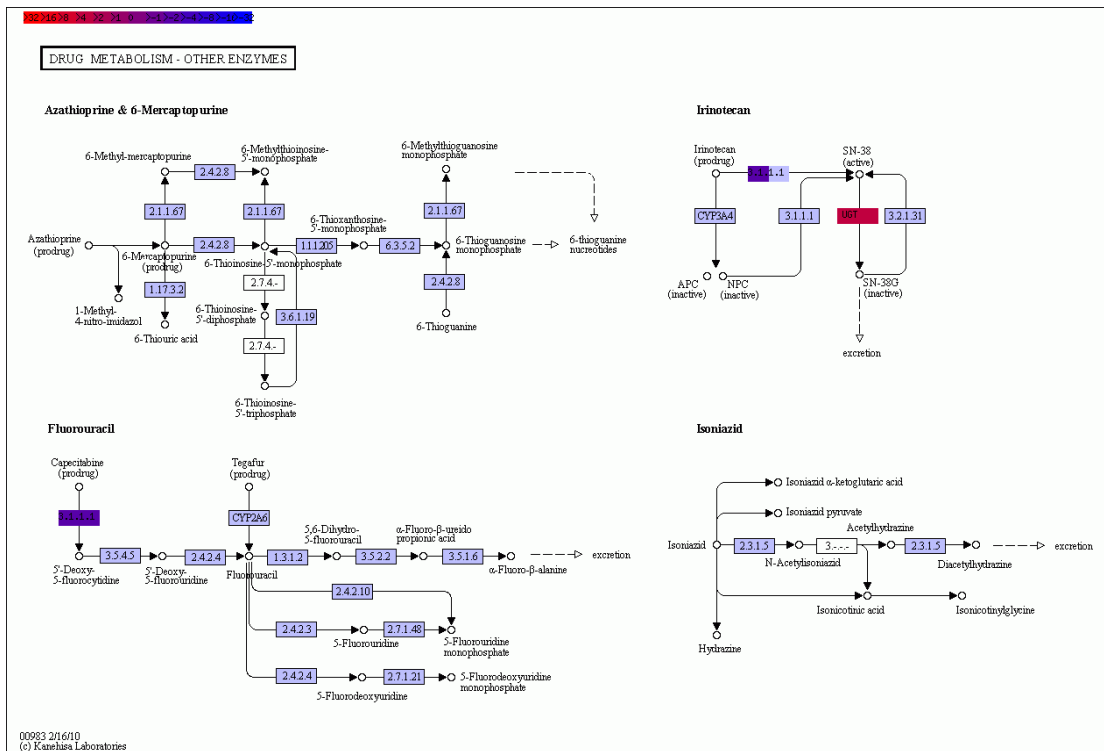

AG

Figure S4. KEGG pathways for drug metabolism-other enzymes.

Table S1 Primer sequence used for qRT-PCR in this study.

| <b>Gene</b>      | <b>Forward primer</b>    | <b>Reverse primer</b>        |
|------------------|--------------------------|------------------------------|
| CYP-33C4         | GATACAGATACAGCAAGGAGAAT  | AACAACCAGACGGAGGAA           |
| CYP-33C2         | CAGTCTGGTTAATGAAGTT      | ATAGCCGTTGAGATTGTA           |
| CYP-33C9         | CTGATATTGTGGCTTGCTA      | AGTCCTACGAGTTGTTGA           |
| UGT-48           | GATGAGATGATGGACAATGGT    | TTAGTTGAGATTCGCAAGCATA       |
| DHS-2            | CGGTATTGCTGCTATTGG       | AAGGAGAGGAATGAGAAGAT         |
| SDR-3            | TATGAAGGTAATTGAAAGG      | ATTATTGACCGAATGAAG           |
| UNC-8            | GGAGATGTGGTCAACTTC       | CAGAGGCACTAAGATTTCG          |
| CBG09704         | GTGCTGAAGTTGTTATTC       | TTGATGGTCTCGTTAATG           |
| T08H10.1         | CCGCTATTATTGTTGTTCCA     | TCCAGAGACCATCAGAT            |
| Collagen protein | GACAGGCTAACAGAACTC       | ATTGGATTGCTTCGTGAA           |
| HSP-70           | CGAAGGAGAAGTTCAGATG      | CTTAGGCGATGAGCAATC           |
| PTR-12           | TTATCCAGAGGTCGTTGA       | ATTCGCTCGTAGTTCTTG           |
| Reference gene   | TCCGTACCCTGAAGTTGGCTAACC | AAGTGGAGACGAGGGAATGGAA<br>CC |
